# Supplementary material for: Clinical Outcomes and Experiences with Prefilled Syringes Versus Vials for Intravitreal Administration of Anti-VEGF Treatments: A Systematic Review
Source: PubMed Central journal article supplement — Ophthalmol Ther. 2024 Jul 27;13(9):2445–65. doi: 10.1007/s40123-024-01002-0 (PMC11341511; doi:10.1007/s40123-024-01002-0), 2024-07-27
Supplement: 40123_2024_1002_MOESM1_ESM.pdf [file 40123_2024_1002_MOESM1_ESM.pdf]

# **Clinical Outcomes and Experiences With Prefilled Syringes Versus Vials for Intravitreal Administration of Anti-VEGF Treatments: A Systematic Review**

Joel Uzzan,<sup>1</sup> Adam Mapani,<sup>2,3</sup> Oliver Cox,<sup>4</sup> Marloes Bagijn,<sup>4</sup> Insaf Saffar<sup>4</sup>

<sup>1</sup> Clinique Mathilde, Vivalto Santé, Rouen, France

<sup>2</sup> Moorfields Eye Hospital NHS Foundation Trust, London, UK

<sup>3</sup> University College London, Department of Clinical Ophthalmology, London, UK

<sup>4</sup> F. Hoffmann-La Roche Ltd., Basel, Switzerland

## **Corresponding author:**

Joel Uzzan, MD

e-mail: [jo.uzzan.oph@gmail.com](mailto:jo.uzzan.oph@gmail.com)

## SUPPLEMENTARY MATERIAL

### Search Strategy

*MEDLINE and The Cochrane Library*

#### 1) Prefilled syringe terms

Free text: “prefill”, “prefilled”, “pre-fill”, “pre-filled”, “PFS”, “ready to administer”, “ready to use”

#### 2) Intravitreal injection terms

MeSH: “eye”, “injections, intraocular”, “intravitreal injections”, “vitreous body”

Free-text: “eye”, “intraocular”, “intravitreal”, “ocular”, “vitreous”

#### Search string

((“prefill”[Title/Abstract] OR “prefilled”[Title/Abstract] OR “pre-fill”[Title/Abstract] OR “pre-filled”[Title/Abstract] OR “PFS”[Title/Abstract] OR “ready to administer”[Title/Abstract] OR “ready to use”[Title/Abstract]) AND (“eye”[MeSH Terms] OR “injections, intraocular”[MeSH Terms] OR “intravitreal injections”[MeSH Terms] OR “vitreous body”[MeSH Terms] OR “eye”[Title/Abstract] OR “intraocular”[Title/Abstract] OR “intravitreal”[Title/Abstract] OR “ocular”[Title/Abstract] OR “vitreous”[Title/Abstract])) NOT (“progression free”[Title/Abstract] OR “progression-free”[Title/Abstract] OR “posterior fixation suture\*”[Title/Abstract] OR “parafoveal scotoma”[Title/Abstract] OR “postural fluctuation\*”[Title/Abstract] OR “postparalytic facial synkinesis”[Title/Abstract] OR “physician fee schedule”[Title/Abstract] OR “parallel fiber\*”[Title/Abstract] OR “punctate fluorescein staining”[Title/Abstract] OR “pollen food syndrome”[Title/Abstract] OR “Parkinson\* fatigue scale”[Title/Abstract])

### EMBASE

#### 1) Prefilled syringe terms

Free text: “prefill”, “prefilled”, “pre-fill”, “pre-filled”, “PFS”, “ready to administer”, “ready to use”

#### 2) Intravitreal injection terms

EMTREE: “eye”, “intraocular drug administration”, “intravitreal drug administration”, “vitreous body”

Free-text: “eye”, “intraocular”, “intravitreal”, “ocular”, “vitreous”

#### Search string

((((prefill or prefilled or pre-fill or pre-filled or PFS or “ready to use” or “ready to administer”) AND (eye or intraocular or intravitreal or ocular or vitreous or eye or intraocular drug administration or intravitreal drug administration or vitreous body)) NOT (“progression free” or “progression-free” or “posterior fixation suture\*” or “parafoveal scotoma” or “postural fluctuation\*” or “postparalytic facial synkinesis” or “physician fee schedule” or “parallel fiber\*” or “punctate fluorescein staining” or “pollen food syndrome” or “Parkinson\* fatigue scale”))

**Table S1** Joanna Briggs Institute critical appraisal checklist for cross sectional studies

| <b>First author, year</b>  | <b>Were the two groups similar and recruited from the same population?</b> | <b>Were the study subjects and the setting described in detail?</b> | <b>Was the exposure measured in a valid and reliable way?</b> | <b>Were objective, standard criteria used for measurement of the condition?</b> | <b>Were confounding factors identified?</b> | <b>Were strategies to deal with confounding factors stated?</b> | <b>Were the outcomes measured in a valid and reliable way?</b> | <b>Was appropriate statistical analysis used?</b> |
|----------------------------|----------------------------------------------------------------------------|---------------------------------------------------------------------|---------------------------------------------------------------|---------------------------------------------------------------------------------|---------------------------------------------|-----------------------------------------------------------------|----------------------------------------------------------------|---------------------------------------------------|
| Michaud 2014 [16]          | Unclear                                                                    | Unclear                                                             | NA                                                            | NA                                                                              | Unclear                                     | Unclear                                                         | Unclear                                                        | Unclear                                           |
| Woodcock 2014 [17]         | Unclear                                                                    | Unclear                                                             | NA                                                            | NA                                                                              | Unclear                                     | Unclear                                                         | Unclear                                                        | Unclear                                           |
| Souied 2015 [18]           | Yes                                                                        | Yes                                                                 | NA                                                            | NA                                                                              | Yes                                         | Yes                                                             | Yes                                                            | Yes                                               |
| Subhi 2016 [19]            | Yes                                                                        | Yes                                                                 | NA                                                            | NA                                                                              | Yes                                         | Yes                                                             | Yes                                                            | Yes                                               |
| Ayan 2017 [20]             | Unclear                                                                    | No                                                                  | NA                                                            | NA                                                                              | No                                          | No                                                              | Yes                                                            | Unclear                                           |
| Antoszyk 2018 [41]         | NA                                                                         | Yes                                                                 | NA                                                            | NA                                                                              | Yes                                         | No                                                              | Yes                                                            | NA                                                |
| Baudin 2018 [21]           | Yes                                                                        | Yes                                                                 | NA                                                            | NA                                                                              | Yes                                         | Yes                                                             | Yes                                                            | Yes                                               |
| Tauqeer 2018 [22]          | Unclear                                                                    | Yes                                                                 | NA                                                            | NA                                                                              | Unclear                                     | Unclear                                                         | Yes                                                            | Yes                                               |
| Loewenstein 2019 [23]      | Yes                                                                        | Yes                                                                 | NA                                                            | NA                                                                              | No                                          | No                                                              | Yes                                                            | Yes                                               |
| Storey 2019 [24]           | Yes                                                                        | Yes                                                                 | NA                                                            | NA                                                                              | Yes                                         | No                                                              | Yes                                                            | Yes                                               |
| Dhoot 2021 [25]            | Yes                                                                        | Yes                                                                 | NA                                                            | NA                                                                              | Yes                                         | No                                                              | Yes                                                            | Yes                                               |
| Karatsai 2021 [26]         | Yes                                                                        | Yes                                                                 | NA                                                            | NA                                                                              | No                                          | No                                                              | Yes                                                            | Unclear                                           |
| Krauthammer 2021 [27]      | Yes                                                                        | Yes                                                                 | NA                                                            | NA                                                                              | Yes                                         | No                                                              | Yes                                                            | Yes                                               |
| Pancholy 2021 [28]         | Yes                                                                        | Yes                                                                 | NA                                                            | NA                                                                              | Yes                                         | Yes                                                             | Yes                                                            | Yes                                               |
| Ugurlu 2021 [29]           | Unclear                                                                    | No                                                                  | NA                                                            | NA                                                                              | No                                          | No                                                              | Yes                                                            | Unclear                                           |
| Ulaş 2021 [30]             | Unclear                                                                    | Yes                                                                 | NA                                                            | NA                                                                              | No                                          | No                                                              | Yes                                                            | Unclear                                           |
| Aparicio Carreno 2022 [31] | Unclear                                                                    | No                                                                  | NA                                                            | NA                                                                              | No                                          | No                                                              | Unclear                                                        | Unclear                                           |

| <b>First author, year</b> | <b>Were the two groups similar and recruited from the same population?</b> | <b>Were the study subjects and the setting described in detail?</b> | <b>Was the exposure measured in a valid and reliable way?</b> | <b>Were objective, standard criteria used for measurement of the condition?</b> | <b>Were confounding factors identified?</b> | <b>Were strategies to deal with confounding factors stated?</b> | <b>Were the outcomes measured in a valid and reliable way?</b> | <b>Was appropriate statistical analysis used?</b> |
|---------------------------|----------------------------------------------------------------------------|---------------------------------------------------------------------|---------------------------------------------------------------|---------------------------------------------------------------------------------|---------------------------------------------|-----------------------------------------------------------------|----------------------------------------------------------------|---------------------------------------------------|
| Dingerkus 2022 [32]       | Yes                                                                        | Yes                                                                 | NA                                                            | NA                                                                              | Yes                                         | Yes                                                             | Yes                                                            | Yes                                               |
| Finkelstein 2022 [33]     | Yes                                                                        | Yes                                                                 | NA                                                            | NA                                                                              | Yes                                         | Yes                                                             | Yes                                                            | Yes                                               |
| Lee 2022 [48]             | Yes                                                                        | Yes                                                                 | NA                                                            | NA                                                                              | Yes                                         | No                                                              | Yes                                                            | Unclear                                           |
| Feng 2023 [34]            | Yes                                                                        | Yes                                                                 | NA                                                            | NA                                                                              | Yes                                         | Yes                                                             | Yes                                                            | Yes                                               |
| Klaas 2023 [35]           | Yes                                                                        | Yes                                                                 | NA                                                            | NA                                                                              | Yes                                         | No                                                              | Yes                                                            | Yes                                               |
| Louis 2023 [36]           | Yes                                                                        | Yes                                                                 | NA                                                            | NA                                                                              | Yes                                         | Yes                                                             | Yes                                                            | Yes                                               |
| Rana 2023 [37]            | Yes                                                                        | No                                                                  | NA                                                            | NA                                                                              | No                                          | No                                                              | Yes                                                            | Unclear                                           |
| Rosanky 2023 [38]         | Yes                                                                        | No                                                                  | NA                                                            | NA                                                                              | No                                          | No                                                              | Yes                                                            | Unclear                                           |
| Russel 2023 [39]          | Yes                                                                        | Yes                                                                 | NA                                                            | NA                                                                              | Yes                                         | No                                                              | Yes                                                            | Yes                                               |
| Schmidt-Ott 2023 [40]     | Yes                                                                        | Yes                                                                 | NA                                                            | NA                                                                              | Yes                                         | No                                                              | Yes                                                            | NA                                                |

NA not applicable

**Table S2** Joanna Briggs Institute critical appraisal checklist for case series

| <b>First author, year</b> | <b>Were there clear criteria for inclusion in the case series?</b> | <b>Was the condition measured in a standard, reliable way for all participants included in the case series?</b> | <b>Were valid methods used for identification of the condition for all participants included in the case series?</b> | <b>Did the case series have consecutive inclusion of participants ?</b> | <b>Did the case series have complete inclusion of participants ?</b> | <b>Was there clear reporting of the demographics of the participants in the study?</b> | <b>Was there clear reporting of clinical information of the participants ?</b> | <b>Were the outcomes or follow up results of cases clearly reported?</b> | <b>Was there clear reporting of the presenting site(s)/clinic(s) demographic information?</b> | <b>Was statistical analysis appropriate ?</b> |
|---------------------------|--------------------------------------------------------------------|-----------------------------------------------------------------------------------------------------------------|----------------------------------------------------------------------------------------------------------------------|-------------------------------------------------------------------------|----------------------------------------------------------------------|----------------------------------------------------------------------------------------|--------------------------------------------------------------------------------|--------------------------------------------------------------------------|-----------------------------------------------------------------------------------------------|-----------------------------------------------|
| Gallagher 2021 [44]       | Yes                                                                | Unclear                                                                                                         | Unclear                                                                                                              | Yes                                                                     | Yes                                                                  | Yes                                                                                    | Yes                                                                            | Yes                                                                      | No                                                                                            | NA                                            |
| Scruggs 2021 [45]         | Yes                                                                | Yes                                                                                                             | Unclear                                                                                                              | Yes                                                                     | Yes                                                                  | Yes                                                                                    | Yes                                                                            | Yes                                                                      | Yes                                                                                           | NA                                            |
| Lee 2022 [48]             | Yes                                                                | Yes                                                                                                             | Yes                                                                                                                  | Yes                                                                     | Yes                                                                  | Yes                                                                                    | Yes                                                                            | Yes                                                                      | Yes                                                                                           | NA                                            |

NA not applicable

**Table S3** Joanna Briggs Institute critical appraisal checklist for expert opinion

| <b>First author, year</b> | <b>Is the source of the opinion clearly identified?</b> | <b>Does the source of opinion have standing in the field of expertise?</b> | <b>Are the interests of the relevant population the central focus of the opinion?</b> | <b>Does the opinion demonstrate a logically defended argument to support the conclusions drawn?</b> | <b>Is there reference to the extant literature?</b> | <b>Is any incongruence with the literature/sources logically defended?</b> |
|---------------------------|---------------------------------------------------------|----------------------------------------------------------------------------|---------------------------------------------------------------------------------------|-----------------------------------------------------------------------------------------------------|-----------------------------------------------------|----------------------------------------------------------------------------|
| Couturier 2021 [47]       | Yes                                                     | Yes                                                                        | Yes                                                                                   | Yes                                                                                                 | No                                                  | NA                                                                         |
| Raevis 2022 [49]          | Yes                                                     | Unclear                                                                    | Yes                                                                                   | Yes                                                                                                 | Yes                                                 | NA                                                                         |

NA not applicable
